# Supplementary material for: Socio-Demographic Factors Associated With COVID-19 Vaccine Hesitancy Among Middle-Aged Adults During the Quebec's Vaccination Campaign
Source: Front Public Health. 2022 Mar 18;10:756037. doi: 10.3389/fpubh.2022.756037 (PMC8971569; doi:10.3389/fpubh.2022.756037)
Supplement: Supplementary Table S1 — Vaccine cohort description. [file Data_Sheet_1.CSV]

Table S1: Vaccine cohort description
	All	Not vaccinated	Vaccinated	Missing data
	N=6105	N=2552	N=3553
Age >60 years	4113 (67.4%)	1183 (46.4%)	2930 (82.5%)	0
Gender:				0
Female	3709 (60.8%)	1538 (60.3%)	2171 (61.1%)
Male	2396 (39.2%)	1014 (39.7%)	1382 (38.9%)
History of COVID-19 infection	153 (2.51%)	84 (3.29%)	69 (1.94%)	0
Country birth:				32
Canada	5466 (90.0%)	2269 (89.4%)	3197 (90.4%)
Other	607 (10.00%)	269 (10.6%)	338 (9.56%)
Current living region:				0
Montreal	1831 (30.0%)	487 (19.1%)	1344 (37.8%)
Other	4274 (70.0%)	2065 (80.9%)	2209 (62.2%)
Highest level of education:				100
0 - Less than high school/High school	752 (12.5%)	304 (12.1%)	448 (12.8%)
1 - College	1677 (27.9%)	771 (30.7%)	906 (26.0%)
2 - Graduate studies/University	3576 (59.6%)	1439 (57.2%)	2137 (61.2%)
Essential worker	563 (9.26%)	323 (12.7%)	240 (6.78%)	25
Dwelling:				2
Apartment or condominium	1564 (25.6%)	564 (22.1%)	1000 (28.2%)
Other	19 (0.31%)	8 (0.31%)	11 (0.31%)
House	4468 (73.2%)	1977 (77.5%)	2491 (70.1%)
Retirement home	52 (0.85%)	2 (0.08%)	50 (1.41%)
Annual household income before the pandemic:				609
1 - <$50,000	1163 (21.2%)	413 (17.8%)	750 (23.6%)
2 - $50,000-$100,000	2228 (40.5%)	878 (37.8%)	1350 (42.5%)
3 - >$100,000	2105 (38.3%)	1031 (44.4%)	1074 (33.8%)
Monthly household income changed because of the COVID-19 pandemic:				114
1 - Substantially decreased-Somewhat decreased	975 (16.3%)	489 (19.4%)	486 (14.0%)
0 - No change-Somewhat increased-Substantially increased	5016 (83.7%)	2030 (80.6%)	2986 (86.0%)
Savings changed because of the COVID-19 pandemic:				105
1 - Substantially decreased-Somewhat decreased	828 (13.8%)	400 (15.9%)	428 (12.3%)
0 - No change-Somewhat increased-Substantially increased	5172 (86.2%)	2116 (84.1%)	3056 (87.7%)
Impact of COVID-19 on the ability to meet financial obligations or essential needs:				104
0 - No impact-Minor impact	5578 (93.0%)	2304 (91.5%)	3274 (94.0%)
1 - Moderate impact-Major impact	423 (7.05%)	215 (8.54%)	208 (5.97%)
Ethnicity: White	5557 (93.0%)	2320 (92.4%)	3237 (93.4%)	129
Ethnicity: Black	29 (0.49%)	18 (0.72%)	11 (0.32%)	129
Ethnicity: Latin Hispanic	46 (0.77%)	28 (1.12%)	18 (0.52%)	129
Ethnicity: Arab	55 (0.92%)	29 (1.15%)	26 (0.75%)	129
Full time/self-employed	2174 (35.9%)	1325 (52.2%)	849 (24.2%)	51
Part-time/self-employed	654 (10.8%)	260 (10.2%)	394 (11.2%)	51
Looking after home and/or family	400 (6.61%)	147 (5.79%)	253 (7.20%)	51
Unable to work because of sickness or disability	124 (2.05%)	68 (2.68%)	56 (1.59%)	51
Unemployed	92 (1.52%)	56 (2.20%)	36 (1.02%)	51
Retired	3349 (55.3%)	947 (37.3%)	2402 (68.4%)	51
Pre-existing medical conditions	4395 (72.0%)	1707 (66.9%)	2688 (75.7%)	0
Current mental and emotional health:				80
0 – Poor	109 (1.81%)	54 (2.14%)	55 (1.57%)
1 – Fair	609 (10.1%)	287 (11.4%)	322 (9.20%)
2 – good	1354 (22.5%)	586 (23.2%)	768 (21.9%)
3 – Very good	2458 (40.8%)	1027 (40.7%)	1431 (40.9%)
4 – Excellent	1495 (24.8%)	570 (22.6%)	925 (26.4%)
Current mental and emotional health compared to before the pandemic:				84
0 – worse	1129 (18.8%)	520 (20.6%)	609 (17.4%)
1 - about the same-better	4892 (81.2%)	2003 (79.4%)	2889 (82.6%)
